# Supplementary material for: Interface passivation to overcome shunting in semiconductor–catalyst junctions
Source: Royal Society of Chemistry journal article supplement (doi:10.1039/c9cc09597g), 2020-01-01
Supplement: c9cc09597g1.pdf [file c9cc09597g1.pdf]

## 1 **Interface Passivation to Overcome Shunting in Semiconductor-Catalyst** 2 **Junctions**

3 Parisa Shadabipour and Thomas W. Hamann\*

4 *Department of Chemistry, Michigan State University 578 South Shaw Lane, East Lansing,*  
5 *Michigan 48824-1322, United States*

6

7

### 8 **Experimental:**

9 Hematite thin films were prepared on Fluorine-doped tin oxide (FTO) coated  
10 aluminoborosilicate glass substrate (Solaronix, 10  $\Omega$ /sq) via electrodeposition (ED) and atomic  
11 layer deposition (ALD) methods using the procedure described previously.<sup>1,2</sup> Before hematite  
12 deposition, FTO substrates were cleaned by sequential sonication in soap, water, and isopropyl  
13 alcohol for about 15 min, followed by drying in an N<sub>2</sub> stream. The electrodeposition of hematite  
14 thin film was performed by submerging the FTO substrate in a solution of 0.1 M FeCl<sub>2</sub>·4H<sub>2</sub>O  
15 (pH~4.3) at 60 °C by applying the constant potential of 1.2 V vs. Ag/AgCl for 30 min under gentle  
16 stirring. Then, amorphous FeOOH film was converted to crystalline Fe<sub>2</sub>O<sub>3</sub> by annealing at 800 °C  
17 for 10 min. The thickness of the hematite film prepared with this method measured to be 25 nm  
18 using atomic force microscopy (AFM).

19 Hematite film was also deposited on 2 nm Ga<sub>2</sub>O<sub>3</sub> underlayer by ALD method. Ga<sub>2</sub>O<sub>3</sub>  
20 underlayer was deposited on FTO substrate by ALD using a modified version of the previously  
21 reported procedure.<sup>3</sup> The Ga<sub>2</sub>O<sub>3</sub> was deposited using tris-(dimethylamido) gallium (III)  
22 (Ga<sub>2</sub>(NMe<sub>2</sub>)<sub>6</sub>) (Strem Chemical Inc.) as the metal precursor and H<sub>2</sub>O as an oxidant. During the  
23 deposition of Ga<sub>2</sub>O<sub>3</sub>, Ga cylinder was heated to 150 °C and pulsed for 0.2 s under exposure mode  
24 for 8 s, followed by a 12 s purge. In order to oxidize gallium precursor a 0.015 s pulse of H<sub>2</sub>O was  
25 then introduced under the same exposure time. Using spectroscopic ellipsometry (Horiba Jobin

26 Yvon, Smart-SE), the growth rate of  $\sim 1.1 \text{ \AA} \text{ Ga}_2\text{O}_3$  per cycle was measured on silicon wafers.  
27 Then  $\sim 30 \text{ nm}$  hematite was deposited on  $\text{Ga}_2\text{O}_3$  underlayer. The precursors for deposition of ALD-  
28 hematite was ferrocene, and wet ozone was used as the oxidation source. During the deposition,  
29 the ferrocene cylinder was heated to  $70 \text{ }^\circ\text{C}$  and pulsed for  $20 \text{ s}$ , followed by purging. Then, an  
30 oxidation cycle consists of 10 sub-cycles of a  $0.015 \text{ s}$   $\text{H}_2\text{O}$  pulse followed by a  $2 \text{ s}$  ozone pulse  
31 where each sub-cycle was separated by a  $5 \text{ s}$  purge. In the end, ALD- $\text{Fe}_2\text{O}_3$  film was annealed at  
32  $500 \text{ }^\circ\text{C}$  for  $2 \text{ h}$  and followed by annealing in a preheated furnace at  $800 \text{ }^\circ\text{C}$  for  $4 \text{ min}$ .

33 ***Electrodeposition of poly (phenylene oxide) (PPO):*** To block exposed FTO on ED-  
34 hematite films, poly (phenylene oxide) (PPO) blocking layer, was selectively polymerized onto  
35 the exposed FTO. The electropolymerization of PPO was performed according to the previous  
36 report.<sup>4</sup> Briefly, the ED-hematite electrodes were submerged in a solution containing  $60 \text{ mM}$   
37 phenol,  $90 \text{ mM}$  2-allylphenol, and  $100 \text{ mM}$   $\text{LiClO}_4$  in 10/10/1 water/ethanol/2-butoxyethanol. The  
38 solution was adjusted to  $\text{pH } 9$  by the addition of  $10 \text{ mM}$  tetrabutylammonium hydroxide in  
39 methanol. The potential of the electrodes was then scanned in the dark with the scan rate of  $100$   
40  $\text{mV s}^{-1}$  from  $0.1$  to  $1.5 \text{ V}$  versus  $\text{Ag/AgCl}$  for  $75$  cycles. In order to remove unreacted monomers  
41 and oligomers, the electrode was soaked in  $10 \text{ mM}$  tetrabutylammonium hydroxide in methanol  
42 for  $10 \text{ min}$ . In the end, the electrode was rinsed with ethanol, and cured in the air at  $150 \text{ }^\circ\text{C}$  for  $30$   
43  $\text{min}$ . We measured the thickness of the PPO layer to be  $12 \text{ nm}$  using ellipsometry (Horiba Jobin  
44 Yvon, Smart-SE) on a silicon wafer coated with gold subjected to the same polymerization  
45 treatment as described above.

46 ***Catalyst deposition:***  $\text{Ni}_{0.75}\text{Fe}_{0.25}\text{O}_x\text{H}_y$  catalyst was deposited on  $1 \text{ cm}^2$  of freshly prepared  
47 ED-hematite photoanode through the spin coating of the metal precursor solution.<sup>5</sup> Before catalyst  
48 deposition, hematite films were rinsed with deionized water and dried with  $\text{N}_2$ . Iron (III) 2-ethyl

49 hexanoate (50% w/w in mineral spirits, Strem Chemicals), and nickel (II) 2-ethyl hexanoate (78%  
 50 w/w in 2-ethyl hexanoic acid, Strem Chemicals) were used as a precursor. An appropriate amount  
 51 of metal precursor was dissolved in hexane to obtain a total concentration of 15% w/w metal  
 52 complex, and further diluted with hexane to obtain a total metal concentration of 50 mM.  
 53 Approximately 200  $\mu$ L of the precursor solution was placed on the substrate, and spinning was  
 54 performed at 3000 rpm for 60 s. The as-prepared catalyst/ED-hematite photoelectrode was treated  
 55 with UV light for 2 h to decompose organic residues (254 nm, 4 W) followed by annealing in a  
 56 preheated furnace at 100 °C in air for 1 h. The thickness of  $\text{Ni}_{0.75}\text{Fe}_{0.25}\text{O}_x\text{H}_y$  is is  $\sim$  220 nm,  
 57 determined using AFM, cross-sectional scanning electron microscopy (SEM) and spectroscopic  
 58 ellipsometry (SE).

| Measured thickness with AFM | Measured thickness with SE | Measured thickness with cross-sectional SEM |
|-----------------------------|----------------------------|---------------------------------------------|
| 220 nm                      | 210 nm                     | 220 nm                                      |

59  
 60 **Table S1. The measured and calculated thickness of the Ni75 on hematite using AFM and SEM, and**  
 61 **on silicon wafer using SE.**

62  
 63 ***(Photo)electrochemical measurements:*** All electrochemical and photoelectrochemical  
 64 measurements were taken in a custom made photoelectrochemical cell setup with an Eco Chemie  
 65 Autolab potentiostat (Nova electrochemical software) in back illumination configuration (photon  
 66 passing through the glass before reaching to the electrode surface). A homemade saturated  
 67 Ag/AgCl and high surface area Pt mesh were used as reference and counter electrode, respectively.  
 68 All (photo) electrochemical measurements were performed at room temperature and in 1.0 M

69 KOH. Aqueous solutions were prepared with ultra-pure water (resistivity 18 MΩ.cm) from a Milli-  
70 Q water purifier.

71 A 450 W Xe arc lamp (Horiba Jobin Yvon) was used as a white light source with an AM  
72 1.5 solar filter to obtain a simulated solar spectrum with 100 mW cm<sup>-2</sup> (1 sun) intensity. All  
73 electrochemical potentials vs. Ag/AgCl were converted to the reversible hydrogen electrode  
74 (RHE) by using equation 1:

$$75 \quad E_{RHE} = E_{Ag/AgCl} + 0.197 \text{ V} + (0.059 \text{ V}) \times pH \quad \text{eq.1}$$

76 Ni<sub>0.75</sub>Fe<sub>0.25</sub>O<sub>x</sub>H<sub>y</sub> film was conditioned by a series of cyclic voltammograms between 0.5  
77 and 1.6 V vs. RHE under illumination until Ni reduction peak remains constant. The *J-E* data  
78 shown for the catalyst-modified electrodes are from the final measurement.

79 **Material characterization:** Scanning electron microscope (SEM) images were taken using  
80 JEOL 7500F (field emission emitter). The cross-sectional sample for scanning transmission  
81 electron micrograph (STEM) was prepared using Thermal Fisher Helios 650 Nanolab SEM/FIB.  
82 Gold and platinum were deposited at the surface of the sample to protect it during the sample  
83 preparation. The high-angle annular dark-field scanning transmission electron microscopy  
84 (HAADF-STEM) and energy-dispersive x-ray (EDX) analysis were taken on a Thermo Fisher  
85 Scientific Talos F200X operated at 200 kV. The X-ray photoelectron spectroscopy (XPS) data  
86 were collected using PerkinElmer Phi 5600 ESCA system equipped with a monochromatic Mg Kα  
87 source to illuminate the sample at a takeoff angle of 45°.

88

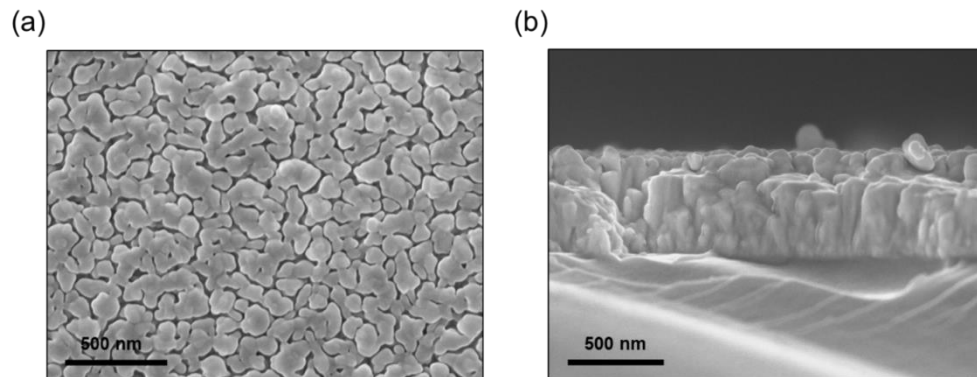

**Figure S1. Scanning electron microscopy images of ED-hematite on FTO substrate. (a) top view (b) cross-sectional view**

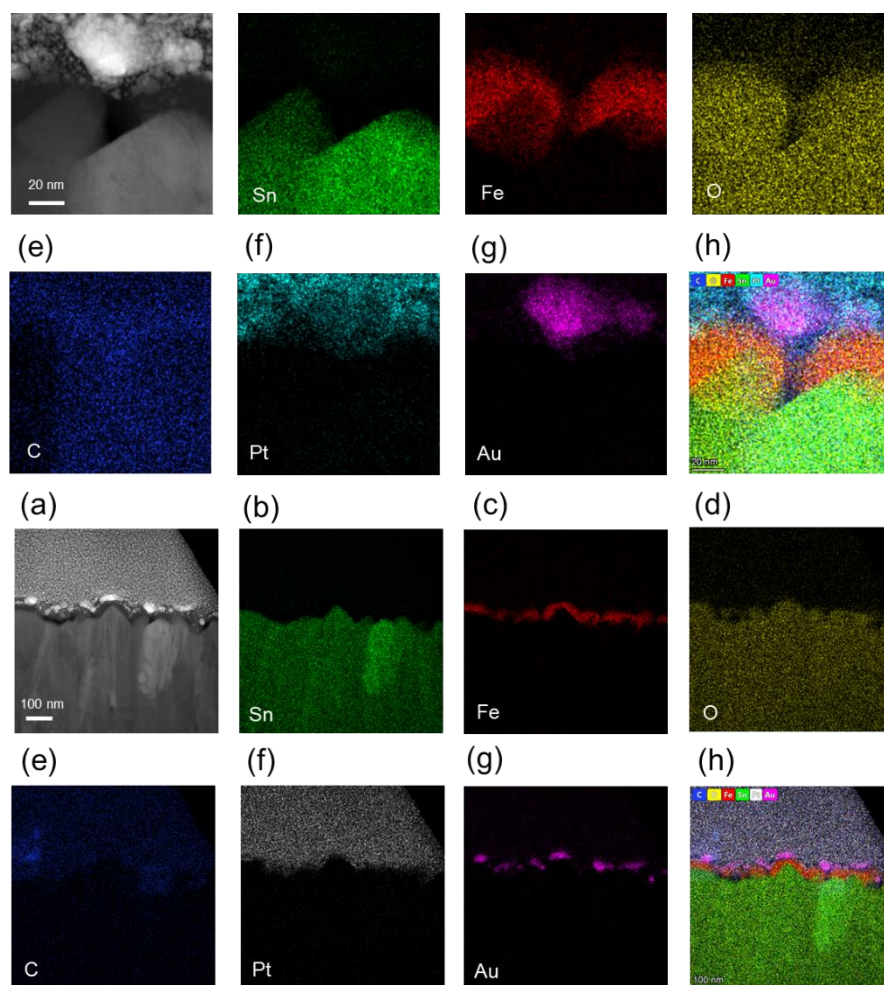

89  
 90 **Figure S2. HAADF-STEM and EDX elemental mapping of the PPO-modified ED-hematite. (a)**  
 91 **HAADF-STEM image and (b-h) EDX mapping of tin (b), iron (c), oxygen (d), carbon (e), platinum (f),**  
 92 **gold (g) and their overlay (h).**

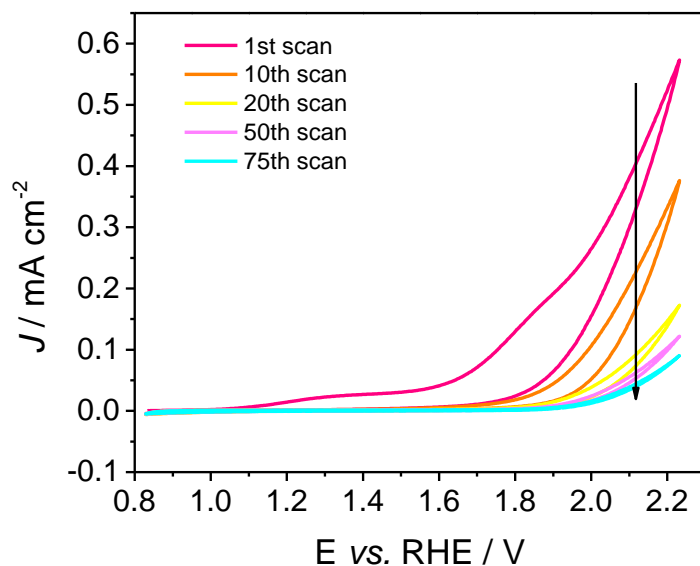

93 **Figure S3. Current density measurements during electrodeposition of PPO into the ED-hematite**  
 94 **pinholes.** The progressive decrease in the current density indicates the growth of the insulating PPO film.  
 95 Scan rates are  $100 \text{ mV s}^{-1}$ .

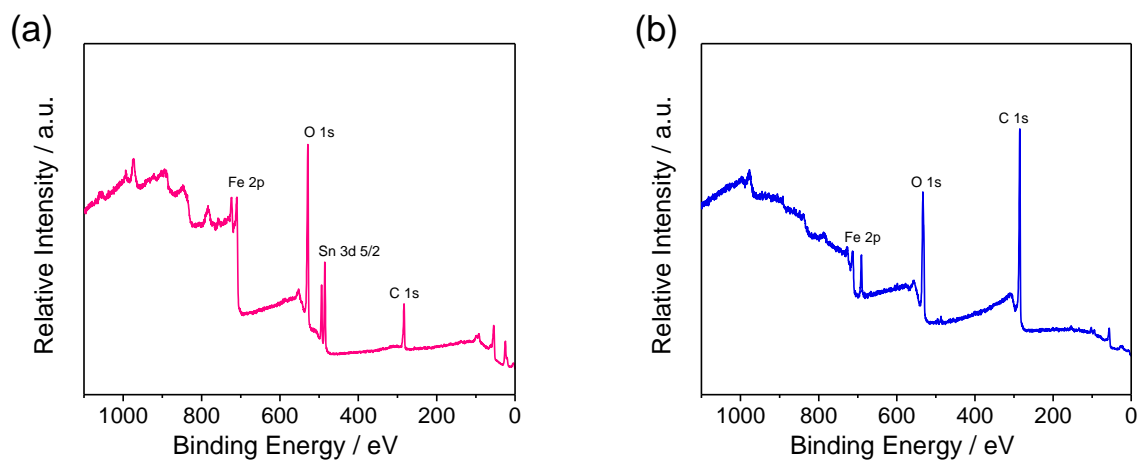

**Figure S4. XPS measurement of (a) bare ED-hematite and (b) PPO modified ED-hematite.**

96

97

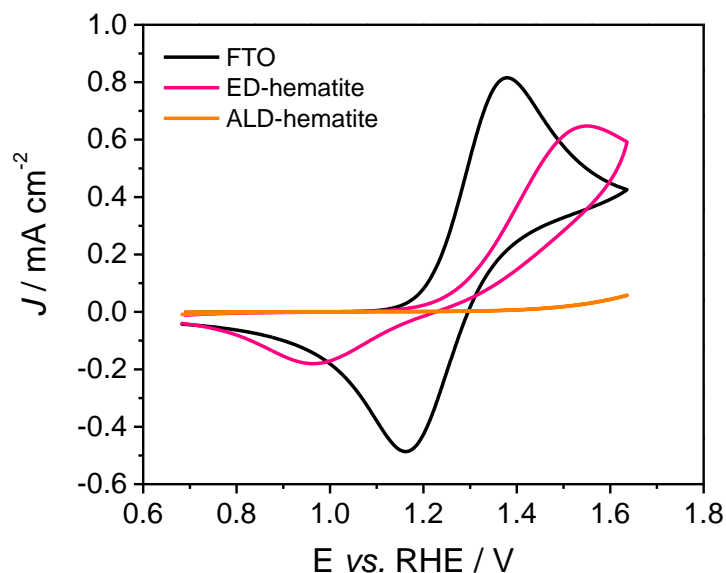

98 **Figure S5. Pinhole-free hematite thin film prepared via ALD.** Dark CV response of the bare FTO  
 99 (black), ED-hematite (pink) and ALD-hematite (orange) in 1.0 M KOH containing 10 mM  $k_4[Fe(CN)_6]$   
 100 solution. The scan rates are  $10 \text{ mVs}^{-1}$ . The negligible current density recorded for the ALD-hematite  
 101 compared to the FTO and ED-hematite indicates a pinhole-free hematite thin film achieved.  
 102

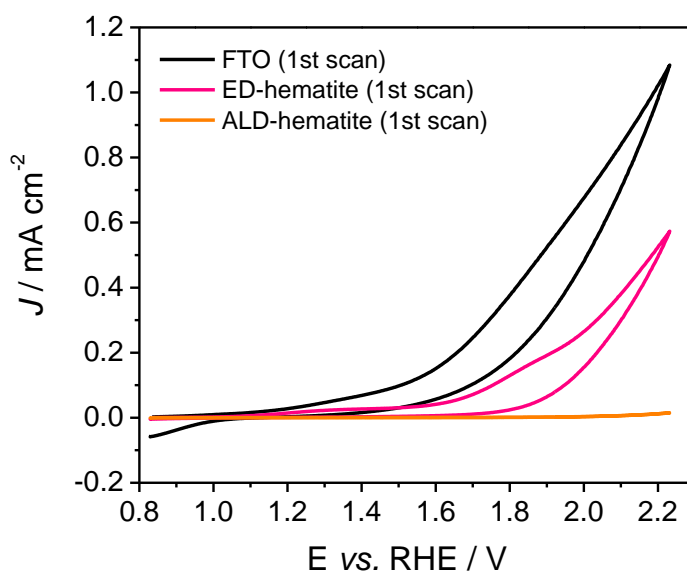

103 **Figure S6. Evidence of selective PPO deposition on FTO.** The measured current density during the first  
 104 scan of PPO electrodeposition on different surfaces, including bare FTO (black), ED-hematite (pink) and  
 105 ALD-hematite (orange). A negligible current was recorded for pinhole-free ALD-hematite suggests that  
 106 hematite surface is electrocatalytically inactive for PPO deposition. Scan rates are  $100 \text{ mVs}^{-1}$ .

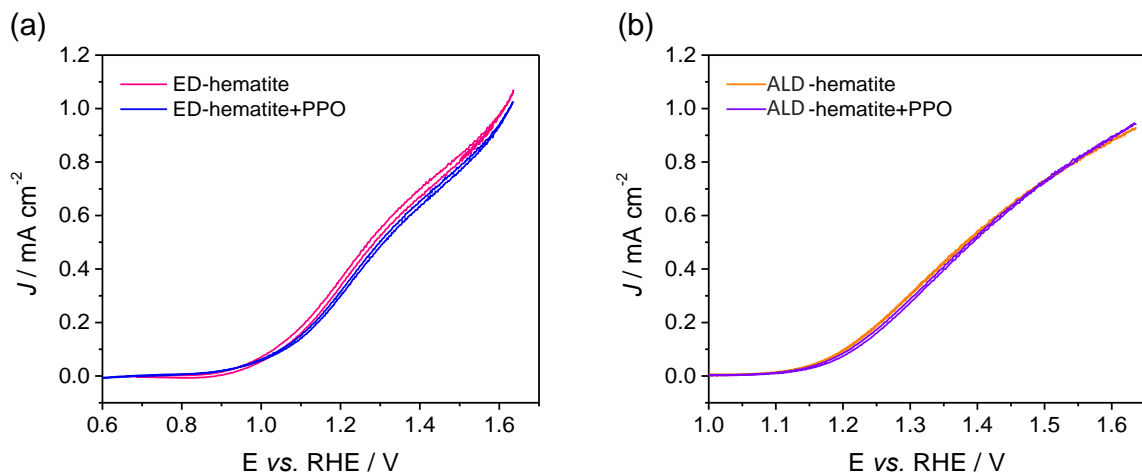

107 **Figure S7. PPO deposition does not compromise the hematite performance for PEC OER.** Comparing  
 108 the  $J$ - $E$  responses for the a) ED-hematite before (pink) and after deposition of PPO (blue) and b) ALD-  
 109 hematite before (orange) and after deposition of PPO (violet). Measurements were executed at a scan rate  
 110 of  $10 \text{ mV s}^{-1}$  under 1 sun illumination in  $1.0 \text{ M KOH}$ .

111

112

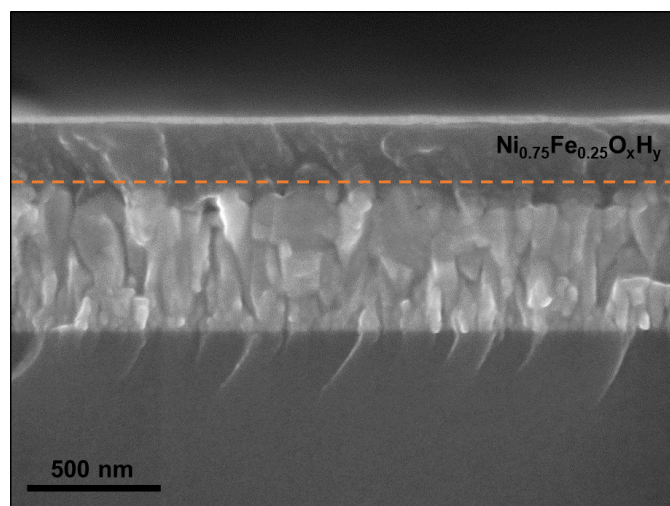

113

114 **Figure S8. Cross-sectional scanning electron microscopy image of ED-hematite modified with**  
 115  **$\text{Ni}_{0.75}\text{Fe}_{0.25}\text{O}_x\text{H}_y$ .**



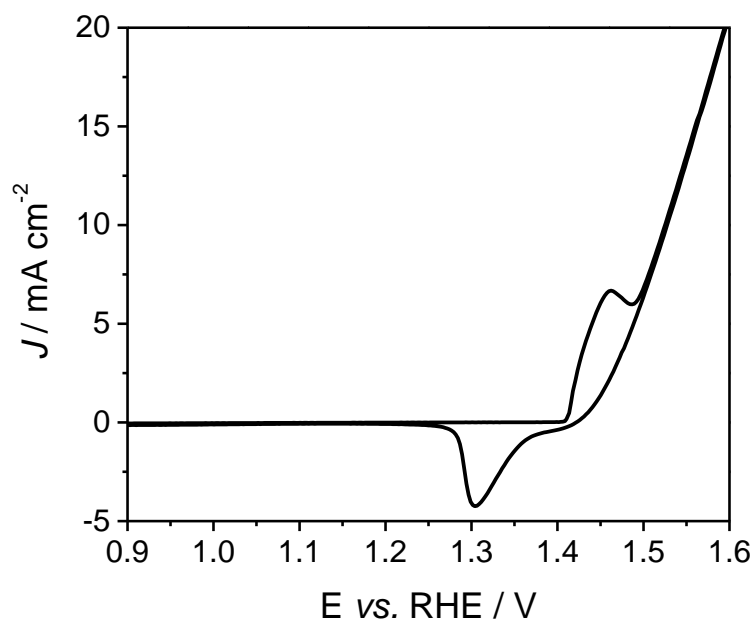

116

117 **Figure S9. *J-E* response of the  $\text{Ni}_{0.75}\text{Fe}_{0.25}\text{O}_x\text{H}_y$  electrocatalyst deposited on the FTO substrate.**

118

119 **References:**

- 120 1 O. Zandi, J. A. Beardslee and T. Hamann, *J. Phys. Chem. C*, 2014, **118**, 16494–16503.
- 121 2 O. Zandi, A. R. Schon, H. Hajibabaei and T. W. Hamann, *Chem. Mater.*, 2016, **28**, 765–771.
- 122 3 D. J. Comstock and J. W. Elam, *Chem. Mater.*, 2012, **24**, 4011–4018.
- 123 4 B. A. Gregg, F. Pichot, S. Ferrere and C. L. Fields, *J. Phys. Chem. B*, 2001, **105**, 1422–1429.
- 124 5 R. D. L. Smith, M. S. Prevot, R. D. Fagan, Z. Zhang, P. A. Sedach, M. K. J. Siu, S. Trudel and C.
- 125 P. Berlinguette, *Science (80-. )*, 2013, **340**, 60–63.

126
